# Supplementary material for: An assessment of electrified methanol production from an environmental perspective
Source: Royal Society of Chemistry journal article supplement (doi:10.1039/d1gc01730f), 2021-01-01
Supplement: d1gc01730f1.pdf [file d1gc01730f1.pdf]

## Supplementary information

### An assessment of electrified methanol production from an environmental perspective

*Evangelos Delikonstantis<sup>1,2</sup>, Elorri Igos<sup>3\*</sup>, Stavros-Alexandros Theofanidis<sup>2,4</sup>, Enrico Benetto<sup>3</sup>, Guy B. Marin<sup>1</sup>, Kevin Van Geem<sup>1</sup> and Georgios D. Stefanidis<sup>1,5\*</sup>*

<sup>1</sup> Laboratory for Chemical Technology, Ghent University, Technologiepark 125, B-9052 Ghent, Belgium

<sup>2</sup> AristEng S.à r.l., 77, Rue de Merl, L-2146, Luxembourg City, Luxembourg

<sup>3</sup> Luxembourg Institute of Science and Technology (LIST), 5, Avenue des Hauts-Fourneaux, L-4362, Esch-sur-Alzette, Luxembourg

<sup>4</sup> Department of Chemical Engineering, Aristotle University of Thessaloniki, University Campus, 54124, Thessaloniki, Greece

<sup>5</sup> School of Chemical Engineering, National Technical University of Athens, Iroon Polytechniou 9, Athens, 15780, Greece

Correspondence to:

Georgios D. Stefanidis

Tel: + 32 (0) 9 331 17 41

e-mail: [georgios.stefanidis@ugent.be](mailto:georgios.stefanidis@ugent.be),  
[gstefani@mail.ntua.gr](mailto:gstefani@mail.ntua.gr)

Elorri Igos

Tel: +352 275 888 5015

e-mail: [elorri.igos@list.lu](mailto:elorri.igos@list.lu)

**Table S-1.** Process conditions and flows of the major streams in plasma-assisted methanol production process.

|                               |       | DMR in | DMR out | SCMR in | SCMR out | Syngas | MeOH-R in | MeOH  |
|-------------------------------|-------|--------|---------|---------|----------|--------|-----------|-------|
| Mass Flows                    | kg/hr | 30026  | 30026   | 53229   | 53229    | 19826  | 68791     | 16353 |
| CO <sub>2</sub>               | kg/hr | 22005  | 12595   | 12595   | 14171    | 1051   | 12726     | 31    |
| CO                            | kg/hr |        | 8095    | 8095    | 16445    | 16273  | 45030     |       |
| H <sub>2</sub>                | kg/hr |        | 647     | 647     | 2503     | 2502   | 9530      |       |
| Natural gas                   | kg/hr | 8021   | 3979    | 3979    |          |        | 5         |       |
| C <sub>2</sub> H <sub>6</sub> | kg/hr |        | 75      | 75      |          |        |           |       |
| C <sub>2</sub> H <sub>4</sub> | kg/hr |        | 175     | 175     |          |        |           |       |
| C <sub>2</sub> H <sub>2</sub> | kg/hr |        | 879     | 879     |          |        |           |       |
| C <sub>3</sub> H <sub>8</sub> | kg/hr |        | 14      | 14      |          |        |           |       |
| Water                         | kg/hr |        | 2450    | 26771   | 20110    |        | 5         | 1     |
| MeOH                          | kg/hr |        |         |         |          |        | 1495      | 16321 |
| Coke                          | kg/hr |        | 1117    |         |          |        |           |       |
| Pressure                      | bar   | 1      | 1       | 1       | 1        | 30     | 30        | 1     |
| Temperature                   | °C    | 25     | 200     | 1000    | 1000     | 250    | 250       | 30    |

**Table S-2.** Process conditions and flows of the major streams in thermocatalytic methanol production process.

|                               |       | DMR in | DMR out | WGS in | WGS out | SMR in | SMR out | Syngas | MeOH-R in | MeOH  |
|-------------------------------|-------|--------|---------|--------|---------|--------|---------|--------|-----------|-------|
| Mass Flows                    | kg/hr | 18766  | 18766   | 25979  | 25979   | 22351  | 22351   | 44052  | 218976    | 3557  |
| CO <sub>2</sub>               | kg/hr | 13753  | 1315    | 1315   | 7739    |        | 71      | 7806   | 85723     | 87    |
| CO                            | kg/hr |        | 15246   | 15246  | 12281   |        | 18068   | 30348  | 90041     |       |
| H <sub>2</sub>                | kg/hr |        | 1039    | 1039   | 1576    |        | 3914    | 5490   | 28607     |       |
| Natural gas                   | kg/hr | 5013   | 750     | 750    | 107     | 10528  | 154     | 260    | 8451      |       |
| C <sub>2</sub> H <sub>6</sub> | kg/hr |        |         |        |         |        |         |        |           |       |
| C <sub>2</sub> H <sub>4</sub> | kg/hr |        |         |        |         |        |         |        |           |       |
| C <sub>2</sub> H <sub>2</sub> | kg/hr |        |         |        |         |        |         |        |           |       |
| C <sub>3</sub> H <sub>8</sub> | kg/hr |        |         |        |         |        |         |        |           |       |
| Water                         | kg/hr |        | 377     | 7629   | 4276    | 11823  | 144     | 148    | 253       | 2     |
| MeOH                          | kg/hr |        |         |        |         |        |         |        | 5901      | 35468 |
| Coke                          | kg/hr |        | 39      |        |         |        |         |        |           |       |
| Pressure                      | bar   | 1      | 1       | 1      | 1       | 1      | 1       | 30     | 30        | 1     |
| Temperature                   | °C    | 750    | 750     | 750    | 750     | 1000   | 1000    | 250    | 250       | 30    |

**Table S-3.** Detailed material and energy flows of the plasma-assisted DMR-to-MeOH process utilizing natural gas as carbon source.

| <b>Plasma-assisted DMR-to-MeOH ; feed: natural gas + CO<sub>2</sub></b> |                                                                   |                        |                                                   |                             |                                            |  |
|-------------------------------------------------------------------------|-------------------------------------------------------------------|------------------------|---------------------------------------------------|-----------------------------|--------------------------------------------|--|
|                                                                         |                                                                   | <b>kg/h</b>            | <b>m<sup>3</sup>/h (25°C; 1bar)</b>               | <b>kg/kg<sub>MeOH</sub></b> | <b>m<sup>3</sup>/kg<sub>MeOH</sub></b>     |  |
| <b>Raw material</b>                                                     | Natural gas (CH <sub>4</sub> )                                    | 8021                   | 12376                                             | 0.49                        | 0.76                                       |  |
|                                                                         | CO <sub>2</sub>                                                   | 8701                   | (CO <sub>2</sub> from 2nd flash drum is recycled) | 0.53                        |                                            |  |
|                                                                         | Water                                                             | 4221                   | (water from 1st flash drum is recycled)           | 0.26                        |                                            |  |
| <b>Utility</b>                                                          |                                                                   | <b>MW</b>              |                                                   | <b>MJ/kg<sub>MeOH</sub></b> |                                            |  |
|                                                                         | Hot utility (oil)                                                 | 30.7                   |                                                   | 6.75                        |                                            |  |
|                                                                         | Cold utility (water)                                              | -39.6                  |                                                   | 393                         | <b>kg/kg<sub>MeOH</sub></b>                |  |
|                                                                         | Cold utility (refrig.)                                            | -23.9                  | 47                                                | 1                           | <b>kWh/Kg<sub>MeOH</sub></b>               |  |
|                                                                         |                                                                   |                        | <b>kW</b>                                         |                             | <b>kWh/kg<sub>MeOH</sub></b>               |  |
|                                                                         | Electricity                                                       | 103594                 |                                                   | 6.3                         |                                            |  |
|                                                                         |                                                                   | 4088                   |                                                   | 0.25                        | <b>CW recirculation<br/>(20 bar loss)</b>  |  |
|                                                                         | Make-up water                                                     |                        |                                                   | 7.9                         | <b>kgwater/kg<sub>MeOH</sub> (5% loss)</b> |  |
| <b>Catalyst Bi</b>                                                      |                                                                   | <b>kg/h</b>            | <b>kg/k<sub>gcat</sub></b>                        | <b>kg/kg<sub>MeOH</sub></b> | <b>m<sup>3</sup>/kg<sub>MeOH</sub></b>     |  |
|                                                                         | Mg(NO <sub>3</sub> ) <sub>2</sub> ·6H <sub>2</sub> O              | 1.3 · 10 <sup>-3</sup> | 1.68                                              | 7.8 · 10 <sup>-8</sup>      |                                            |  |
|                                                                         | Al(NO <sub>3</sub> ) <sub>3</sub> ·9H <sub>2</sub> O              | 3.7 · 10 <sup>-3</sup> | 4.87                                              | 2.3 · 10 <sup>-7</sup>      |                                            |  |
|                                                                         | Ni(NO <sub>3</sub> ) <sub>2</sub> ·6H <sub>2</sub> O              | 3.8 · 10 <sup>-4</sup> | 0.50                                              | 2.3 · 10 <sup>-8</sup>      |                                            |  |
|                                                                         | Fe(NO <sub>3</sub> ) <sub>3</sub> ·9H <sub>2</sub> O              | 3.1 · 10 <sup>-5</sup> | 4 · 10 <sup>-2</sup>                              | 1.9 · 10 <sup>-9</sup>      |                                            |  |
|                                                                         | NH <sub>4</sub> OH (L/kg <sub>cat</sub> ; density = 0.88 kg/L)    | 1.3 · 10 <sup>-3</sup> | 1.76                                              |                             | 8.2 · 10 <sup>-8</sup>                     |  |
|                                                                         | Catalyst demand Kg<br>(4 mol <sub>CO</sub> /s/Kg <sub>cat</sub> ) | 20                     |                                                   |                             |                                            |  |
| Catalyst lifetime Kg <sub>cat</sub> /h (3 years)                        | 8.0 · 10 <sup>-4</sup>                                            |                        |                                                   |                             |                                            |  |
| <b>Catalyst MeOH</b>                                                    |                                                                   | <b>kg/h</b>            | <b>kg/k<sub>gcat</sub></b>                        | <b>kg/kg<sub>MeOH</sub></b> | <b>m<sup>3</sup>/kg<sub>MeOH</sub></b>     |  |
|                                                                         | Cu(NO <sub>3</sub> ) <sub>2</sub> ·3H <sub>2</sub> O              | 7.9 · 10 <sup>-2</sup> | 2.41                                              | 4.8 · 10 <sup>-6</sup>      |                                            |  |
|                                                                         | Al(NO <sub>3</sub> ) <sub>3</sub> ·9H <sub>2</sub> O              | 4.4 · 10 <sup>-2</sup> | 1.33                                              | 2.7 · 10 <sup>-6</sup>      |                                            |  |
|                                                                         | Zn(NO <sub>3</sub> ) <sub>2</sub> ·6H <sub>2</sub> O              | 3.4 · 10 <sup>-2</sup> | 1.03                                              | 2.1 · 10 <sup>-6</sup>      |                                            |  |

|                |                                                                                                                 |                     |                                    |                   |
|----------------|-----------------------------------------------------------------------------------------------------------------|---------------------|------------------------------------|-------------------|
|                | Catalyst demand Kg<br>( $2.7 \text{ mol}_{\text{MeOH}}/\text{s}/\text{Kg}_{\text{cat}}$ ) x 10 (catalyst guard) | 575                 |                                    |                   |
|                | Catalyst lifetime $\text{Kg}_{\text{cat}}/\text{h}$ (2 years)                                                   | $3.3 \cdot 10^{-2}$ |                                    |                   |
|                |                                                                                                                 | <b>kg/h</b>         | <b>Molecular weights (kg/koml)</b> | <b>kg/kgMeOH</b>  |
|                | CO <sub>2</sub> (purge flaring+Waste 1/vapor distillate)                                                        | 2144                | 44.1 CO <sub>2</sub>               | 0.13              |
|                | H <sub>2</sub> O (purge flaring+vapor distillate)                                                               | 2144                | 18.0 H <sub>2</sub> O              | 0.13              |
| <b>Wastes</b>  | CO <sub>2</sub> biogenic                                                                                        | -                   | 2498 demand for flaring            | -                 |
|                | Carbon                                                                                                          | 1117                |                                    | 0.07              |
|                | Water (Waste 2/Bottom liquid)                                                                                   | 1685                |                                    | 0.10              |
|                | Catalysts                                                                                                       | $3.0 \cdot 10^{-2}$ |                                    | $2 \cdot 10^{-6}$ |
|                |                                                                                                                 | <b>kg/h</b>         |                                    |                   |
| <b>Product</b> | MeOH                                                                                                            | 16353               |                                    |                   |

**Table S-4.** Detailed material and energy flows of the plasma-assisted DMR-to-MeOH process utilizing biogas as carbon source.

| <b>Plasma-assisted DMR-to-MeOH ; feed: biogas</b> |                                                                                                                       |                              |                                         |                              |                                            |
|---------------------------------------------------|-----------------------------------------------------------------------------------------------------------------------|------------------------------|-----------------------------------------|------------------------------|--------------------------------------------|
|                                                   |                                                                                                                       | <b>kg/h</b>                  | <b>m<sup>3</sup>/h (25°C; 1bar)</b>     | <b>kg/kg<sub>MeOH</sub></b>  | <b>m<sup>3</sup>/kg<sub>MeOH</sub></b>     |
| <b>Raw material</b>                               | Natural gas (CH <sub>4</sub> )                                                                                        | -                            | -                                       | -                            | -                                          |
|                                                   | Biogas                                                                                                                | 30026                        |                                         | 1.84                         |                                            |
|                                                   | Water                                                                                                                 | 4221                         | (water from 1st flash drum is recycled) | 0.26                         |                                            |
| <b>Utility</b>                                    |                                                                                                                       | <b>MW</b>                    |                                         | <b>MJ/kg<sub>MeOH</sub></b>  |                                            |
|                                                   | Hot utility (oil)                                                                                                     | 30.7                         |                                         | 6.75                         |                                            |
|                                                   | Cold utility (water)                                                                                                  | -39.6                        |                                         | 393                          | <b>kg/kg<sub>MeOH</sub></b>                |
|                                                   | Cold utility (refrig.)                                                                                                | -23.9                        | 47                                      | 1                            | <b>kWh/Kg<sub>MeOH</sub></b>               |
|                                                   |                                                                                                                       | <b>kW</b>                    |                                         | <b>kWh/kg<sub>MeOH</sub></b> |                                            |
|                                                   | Electricity                                                                                                           | 103594                       |                                         | 6.3                          |                                            |
|                                                   |                                                                                                                       | 4088                         |                                         | 0.25                         | <b>CW recirculation<br/>(20 bar loss)</b>  |
|                                                   | Make-up water                                                                                                         |                              |                                         | 7.9                          | <b>kgwater/kg<sub>MeOH</sub> (5% loss)</b> |
| <b>Catalyst Bi</b>                                |                                                                                                                       | <b>kg/h</b>                  | <b>kg/k<sub>gcat</sub></b>              | <b>kg/kg<sub>MeOH</sub></b>  | <b>m<sup>3</sup>/kg<sub>MeOH</sub></b>     |
|                                                   | Mg(NO <sub>3</sub> ) <sub>2</sub> ·6H <sub>2</sub> O                                                                  | 1.3 · 10 <sup>-3</sup>       | 1.68                                    | 7.8 · 10 <sup>-8</sup>       |                                            |
|                                                   | Al(NO <sub>3</sub> ) <sub>3</sub> ·9H <sub>2</sub> O                                                                  | 3.7 · 10 <sup>-3</sup>       | 4.87                                    | 2.3 · 10 <sup>-7</sup>       |                                            |
|                                                   | Ni(NO <sub>3</sub> ) <sub>2</sub> ·6H <sub>2</sub> O                                                                  | 3.8 · 10 <sup>-4</sup>       | 0.50                                    | 2.3 · 10 <sup>-8</sup>       |                                            |
|                                                   | Fe(NO <sub>3</sub> ) <sub>3</sub> ·9H <sub>2</sub> O                                                                  | 3.1 · 10 <sup>-5</sup>       | 4 · 10 <sup>-2</sup>                    | 1.9 · 10 <sup>-9</sup>       |                                            |
|                                                   | NH <sub>4</sub> OH (L/kg <sub>cat</sub> ; density = 0.88 kg/L)                                                        | 1.3 · 10 <sup>-3</sup>       | 1.76                                    |                              | 8.2 · 10 <sup>-8</sup>                     |
|                                                   | Catalyst demand Kg<br>(4 mol <sub>CO</sub> /s/Kg <sub>cat</sub> )<br>Catalyst lifetime Kg <sub>cat</sub> /h (3 years) | 20<br>8.0 · 10 <sup>-4</sup> |                                         |                              |                                            |
| <b>H<sub>2</sub>S removal</b>                     |                                                                                                                       | <b>kg/h</b>                  | <b>kg/k<sub>gcat</sub></b>              | <b>kg/kg<sub>MeOH</sub></b>  | <b>m<sup>3</sup>/kg<sub>MeOH</sub></b>     |
|                                                   | ZnO<br>Material demand Kg/h (13.9 kgbiogas/ZnO)                                                                       | 2160                         |                                         | 0.13                         |                                            |

|                      |                                                                                             |                       |                                    |                             |                                        |
|----------------------|---------------------------------------------------------------------------------------------|-----------------------|------------------------------------|-----------------------------|----------------------------------------|
|                      |                                                                                             | <b>kg/h</b>           | <b>kg/k<sub>gcat</sub></b>         | <b>kg/kg<sub>MeOH</sub></b> | <b>m<sup>3</sup>/kg<sub>MeOH</sub></b> |
| <b>Catalyst MeOH</b> | Cu(NO <sub>3</sub> ) <sub>2</sub> ·3H <sub>2</sub> O                                        | 7.9 ·10 <sup>-2</sup> | 2.41                               | 4.8 ·10 <sup>-6</sup>       |                                        |
|                      | Al(NO <sub>3</sub> ) <sub>3</sub> ·9H <sub>2</sub> O                                        | 4.4 ·10 <sup>-2</sup> | 1.33                               | 2.7 ·10 <sup>-6</sup>       |                                        |
|                      | Zn(NO <sub>3</sub> ) <sub>2</sub> ·6H <sub>2</sub> O                                        | 3.4 ·10 <sup>-2</sup> | 1.03                               | 2.1 ·10 <sup>-6</sup>       |                                        |
|                      | Catalyst demand Kg<br>(2.7 mol <sub>MeOH</sub> /s/K <sub>gcat</sub> ) x 10 (catalyst guard) | 575                   |                                    |                             |                                        |
|                      | Catalyst lifetime Kg <sub>cat</sub> /h (2 years)                                            | 3.3 ·10 <sup>-2</sup> |                                    |                             |                                        |
|                      |                                                                                             | <b>kg/h</b>           | <b>Molecular weights (kg/koml)</b> | <b>kg/kg<sub>MeOH</sub></b> |                                        |
| <b>Wastes</b>        | CO <sub>2</sub> (purge flaring+Waste 1/vapor distillate)                                    | 2144                  | 44.1 CO <sub>2</sub>               | 0.13                        |                                        |
|                      | H <sub>2</sub> O (purge flaring+vapor distillate)                                           | 2144                  | 18.0 H <sub>2</sub> O              | 0.13                        |                                        |
|                      | CO <sub>2</sub> biogenic                                                                    | 13304                 | 2498 demand for flaring            | 0.81                        |                                        |
|                      | Carbon                                                                                      | 1117                  |                                    | 7.0 ·10 <sup>-2</sup>       |                                        |
|                      | Water (Waste 2/Bottom liquid)                                                               | 1685                  |                                    | 0.10                        |                                        |
|                      | Catalysts                                                                                   | 3.0 ·10 <sup>-2</sup> |                                    | 2 ·10 <sup>-6</sup>         |                                        |
|                      |                                                                                             | <b>kg/h</b>           |                                    |                             |                                        |
| <b>Product</b>       | MeOH                                                                                        | 16353                 |                                    |                             |                                        |

**Table S-5.** Detailed material and energy flows of the thermocatalytic DMR-to-MeOH process utilizing natural gas as carbon source.

| <b>Thermocatalytic DMR-to-MeOH ; feed: natural gas + CO<sub>2</sub></b> |                                                                                                    |                        |                                                    |                              |                                                       |
|-------------------------------------------------------------------------|----------------------------------------------------------------------------------------------------|------------------------|----------------------------------------------------|------------------------------|-------------------------------------------------------|
|                                                                         |                                                                                                    | <b>kg/h</b>            | <b>m<sup>3</sup>/h (25°C; 1bar)</b>                | <b>kg/kg<sub>MeOH</sub></b>  | <b>m<sup>3</sup>/kg<sub>MeOH</sub></b>                |
| <b>Raw material</b>                                                     | Natural gas (CH <sub>4</sub> )                                                                     | 15541                  | 23978                                              | 0.44                         | 0.67                                                  |
|                                                                         | CO <sub>2</sub>                                                                                    | 13753                  |                                                    | 0.39                         |                                                       |
|                                                                         | Water                                                                                              | 14797                  | (water from 1st, 2nd & 3rd flash drum is recycled) | 0.42                         |                                                       |
| <b>Utility</b>                                                          |                                                                                                    | <b>MW</b>              |                                                    | <b>MJ/kg<sub>MeOH</sub></b>  |                                                       |
|                                                                         | Hot utility (oil)                                                                                  | 100.3                  |                                                    | 10                           |                                                       |
|                                                                         | Cold utility (water)                                                                               | -103.7                 |                                                    | 475                          | <b>kg<sub>water</sub>/kg<sub>MeOH</sub></b>           |
|                                                                         | Cold utility (refrig.)                                                                             | -6.6                   | 13                                                 | 0.13                         | <b>kWh<sub>cooling</sub>/Kg<sub>MeOH</sub></b>        |
|                                                                         |                                                                                                    | <b>kW</b>              |                                                    | <b>kWh/kg<sub>MeOH</sub></b> |                                                       |
|                                                                         | Electricity                                                                                        | 38225                  |                                                    | 1.1                          |                                                       |
|                                                                         |                                                                                                    | 10667                  |                                                    | 0.3                          | <b>CW recirculation (20 bar loss)</b>                 |
|                                                                         | Make-up water                                                                                      |                        |                                                    | 9.5                          | <b>kg<sub>water</sub>/kg<sub>MeOH</sub> (5% loss)</b> |
| <b>Catalyst DMR</b>                                                     |                                                                                                    | <b>kg/h</b>            | <b>kg/kg<sub>cat</sub></b>                         | <b>kg/kg<sub>MeOH</sub></b>  | <b>m<sup>3</sup>/kg<sub>MeOH</sub></b>                |
|                                                                         | Mg(NO <sub>3</sub> ) <sub>2</sub> ·6H <sub>2</sub> O                                               | 2.5 · 10 <sup>-3</sup> | 1.68                                               | 6.9 · 10 <sup>-8</sup>       |                                                       |
|                                                                         | Al(NO <sub>3</sub> ) <sub>3</sub> ·9H <sub>2</sub> O                                               | 7.1 · 10 <sup>-3</sup> | 4.87                                               | 2.0 · 10 <sup>-7</sup>       |                                                       |
|                                                                         | Ni(NO <sub>3</sub> ) <sub>2</sub> ·6H <sub>2</sub> O                                               | 7.3 · 10 <sup>-4</sup> | 0.50                                               | 2.1 · 10 <sup>-8</sup>       |                                                       |
|                                                                         | Fe(NO <sub>3</sub> ) <sub>3</sub> ·9H <sub>2</sub> O                                               | 5.9 · 10 <sup>-5</sup> | 0.04                                               | 1.6 · 10 <sup>-9</sup>       |                                                       |
|                                                                         | NH <sub>4</sub> OH (= 2 L/kg <sub>cat</sub> )<br>(considering density = 0.88 kg/L)                 | 2.6 · 10 <sup>-3</sup> | 1.76                                               |                              | 7.0 · 10 <sup>-5</sup>                                |
|                                                                         | <b>Catalyst demand Kg (5.9 mol<sub>CO</sub>/s/Kg<sub>cat</sub>)</b>                                | 26                     |                                                    |                              |                                                       |
| <b>Catalyst lifetime Kg<sub>cat</sub>/h (2 years)</b>                   | 1.5 · 10 <sup>-3</sup>                                                                             |                        |                                                    |                              |                                                       |
| <b>Catalyst MeOH</b>                                                    |                                                                                                    | <b>kg/h</b>            | <b>kg/kg<sub>cat</sub></b>                         | <b>kg/kg<sub>MeOH</sub></b>  | <b>m<sup>3</sup>/kg<sub>MeOH</sub></b>                |
|                                                                         | Cu(NO <sub>3</sub> ) <sub>2</sub> ·3H <sub>2</sub> O                                               | 1.6 · 10 <sup>-1</sup> | 2.41                                               | 4.5 · 10 <sup>-6</sup>       |                                                       |
|                                                                         | Al(NO <sub>3</sub> ) <sub>3</sub> ·9H <sub>2</sub> O                                               | 8.8 · 10 <sup>-2</sup> | 1.33                                               | 2.5 · 10 <sup>-6</sup>       |                                                       |
|                                                                         | Zn(NO <sub>3</sub> ) <sub>2</sub> ·6H <sub>2</sub> O                                               | 6.8 · 10 <sup>-2</sup> | 1.03                                               | 1.9 · 10 <sup>-6</sup>       |                                                       |
|                                                                         | <b>Catalyst demand Kg</b><br>(2.7 mol <sub>MeOH</sub> /s/Kg <sub>cat</sub> ) x 10 (catalyst guard) | 1154                   |                                                    |                              |                                                       |

|                     |                                                                     |                        |                                              |                             |
|---------------------|---------------------------------------------------------------------|------------------------|----------------------------------------------|-----------------------------|
|                     | <b>Catalyst lifetime Kg<sub>cat</sub>/h (2 years)</b>               | 6.6 · 10 <sup>-2</sup> |                                              |                             |
| <b>Catalyst SMR</b> |                                                                     | <b>kg/h</b>            | <b>kg/kg<sub>cat</sub></b>                   | <b>kg/kg<sub>MeOH</sub></b> |
|                     | Mg(NO <sub>3</sub> ) <sub>2</sub> ·6H <sub>2</sub> O                | 1.8 · 10 <sup>-3</sup> | 1.68                                         | 5.0 · 10 <sup>-8</sup>      |
|                     | Al(NO <sub>3</sub> ) <sub>3</sub> ·9H <sub>2</sub> O                | 5.1 · 10 <sup>-3</sup> | 4.87                                         | 1.4 · 10 <sup>-7</sup>      |
|                     | Ni(NO <sub>3</sub> ) <sub>2</sub> ·6H <sub>2</sub> O                | 5.2 · 10 <sup>-4</sup> | 0.50                                         | 1.5 · 10 <sup>-8</sup>      |
|                     | Fe(NO <sub>3</sub> ) <sub>3</sub> ·9H <sub>2</sub> O                | 4.2 · 10 <sup>-5</sup> | 0.04                                         | 1.2 · 10 <sup>-9</sup>      |
|                     | NH <sub>4</sub> OH (= 2 L/kg <sub>cat</sub> ; density = 0.88 kg/L)  | 1.8 · 10 <sup>-3</sup> | 1.76                                         |                             |
|                     | <b>Catalyst demand Kg (3.9 mol<sub>CO</sub>/s/Kg<sub>cat</sub>)</b> | 46                     |                                              | 5.0 · 10 <sup>-5</sup>      |
|                     | <b>Catalyst lifetime Kg<sub>cat</sub>/h (5 years)</b>               | 1.0 · 10 <sup>-3</sup> |                                              |                             |
| <b>Catalyst WGS</b> |                                                                     | <b>kg/h</b>            | <b>kg/kg<sub>cat</sub></b>                   | <b>kg/kg<sub>MeOH</sub></b> |
|                     | La(NO <sub>3</sub> ) <sub>3</sub> ·6H <sub>2</sub> O                | 4.7 · 10 <sup>-2</sup> | 2.20                                         | 1.3 · 10 <sup>-6</sup>      |
|                     | (NH <sub>4</sub> ) <sub>2</sub> Ce(NO <sub>3</sub> ) <sub>6</sub>   | 1.7 · 10 <sup>-2</sup> | 0.80                                         | 4.9 · 10 <sup>-7</sup>      |
|                     | Fe(NO <sub>3</sub> ) <sub>3</sub> ·9H <sub>2</sub> O                | 1.6 · 10 <sup>-2</sup> | 0.72                                         | 4.4 · 10 <sup>-7</sup>      |
|                     | Glycerol                                                            | 4.1 · 10 <sup>-2</sup> | 1.90                                         | 1.2 · 10 <sup>-6</sup>      |
|                     | <b>Catalyst demand Kg (0.4 mol<sub>CO</sub>/s/Kg<sub>cat</sub>)</b> | 378                    |                                              |                             |
|                     | <b>Catalyst lifetime Kg<sub>cat</sub>/h (2 years)</b>               | 2.2 · 10 <sup>-2</sup> |                                              |                             |
| <b>Wastes</b>       |                                                                     | <b>kg/h</b>            | <b>Molecular weights (kg/koml)</b>           | <b>kg/kg<sub>MeOH</sub></b> |
|                     | CO <sub>2</sub> (purge flaring+Waste 1/vapor distillate)            | 7103                   | 44.1 CO <sub>2</sub>                         | 0.20                        |
|                     | H <sub>2</sub> O (purge flaring+vapor distillate)                   | 7515                   | 18.0 H <sub>2</sub> O                        | 0.21                        |
|                     | CO <sub>2</sub> biogenic                                            | -                      | *8473 kg/h O <sub>2</sub> demand for flaring | -                           |
|                     | Carbon                                                              | 39                     |                                              | 1.1 · 10 <sup>-3</sup>      |
|                     | Water (Waste 2/Bottom liquid)                                       | 2363                   |                                              | 7.0 · 10 <sup>-2</sup>      |
|                     | Catalysts                                                           | 9.0 · 10 <sup>-2</sup> |                                              | 2.5 · 10 <sup>-6</sup>      |
| <b>Product</b>      |                                                                     | <b>kg/h</b>            |                                              |                             |
|                     | MeOH                                                                | 35557                  |                                              |                             |



**Table S-6.** Detailed material and energy flows of the thermocatalytic DMR-to-MeOH process utilizing biogas as carbon source.

| <b>Thermocatalytic DMR-to-MeOH ; feed: biogas</b> |                                                                                                    |                        |                                                    |                              |                                                       |
|---------------------------------------------------|----------------------------------------------------------------------------------------------------|------------------------|----------------------------------------------------|------------------------------|-------------------------------------------------------|
|                                                   |                                                                                                    | <b>kg/h</b>            | <b>m<sup>3</sup>/h (25°C; 1bar)</b>                | <b>kg/kg<sub>MeOH</sub></b>  | <b>m<sup>3</sup>/kg<sub>MeOH</sub></b>                |
| <b>Raw material</b>                               | Natural gas (CH <sub>4</sub> )                                                                     | 10528                  | 16243                                              | 0.30                         | 0.46                                                  |
|                                                   | Biogas                                                                                             | 18766                  |                                                    | 0.53                         |                                                       |
|                                                   | Water                                                                                              | 14797                  | (water from 1st, 2nd & 3rd flash drum is recycled) | 0.42                         |                                                       |
| <b>Utility</b>                                    |                                                                                                    | <b>MW</b>              |                                                    | <b>MJ/kg<sub>MeOH</sub></b>  |                                                       |
|                                                   | Hot utility (oil)                                                                                  | 100.3                  |                                                    | 10                           |                                                       |
|                                                   | Cold utility (water)                                                                               | -103.7                 |                                                    | 475                          | <b>kg<sub>water</sub>/kg<sub>MeOH</sub></b>           |
|                                                   | Cold utility (refrig.)                                                                             | -6.6                   | 13                                                 | 0.13                         | <b>kWh<sub>cooling</sub>/Kg<sub>MeOH</sub></b>        |
|                                                   |                                                                                                    | <b>kW</b>              |                                                    | <b>kWh/kg<sub>MeOH</sub></b> |                                                       |
|                                                   | Electricity                                                                                        | 38225                  |                                                    | 1.1                          |                                                       |
|                                                   |                                                                                                    | 10667                  |                                                    | 0.3                          | <b>CW recirculation (20 bar loss)</b>                 |
|                                                   | Make-up water                                                                                      |                        |                                                    | 9.5                          | <b>kg<sub>water</sub>/kg<sub>MeOH</sub> (5% loss)</b> |
| <b>Catalyst DMR</b>                               |                                                                                                    | <b>kg/h</b>            | <b>kg/kg<sub>cat</sub></b>                         | <b>kg/kg<sub>MeOH</sub></b>  | <b>m<sup>3</sup>/kg<sub>MeOH</sub></b>                |
|                                                   | Mg(NO <sub>3</sub> ) <sub>2</sub> ·6H <sub>2</sub> O                                               | 2.5 · 10 <sup>-3</sup> | 1.68                                               | 6.9 · 10 <sup>-8</sup>       |                                                       |
|                                                   | Al(NO <sub>3</sub> ) <sub>3</sub> ·9H <sub>2</sub> O                                               | 7.1 · 10 <sup>-3</sup> | 4.87                                               | 2.0 · 10 <sup>-7</sup>       |                                                       |
|                                                   | Ni(NO <sub>3</sub> ) <sub>2</sub> ·6H <sub>2</sub> O                                               | 7.3 · 10 <sup>-4</sup> | 0.50                                               | 2.1 · 10 <sup>-8</sup>       |                                                       |
|                                                   | Fe(NO <sub>3</sub> ) <sub>3</sub> ·9H <sub>2</sub> O                                               | 5.9 · 10 <sup>-5</sup> | 0.04                                               | 1.6 · 10 <sup>-9</sup>       |                                                       |
|                                                   | NH <sub>4</sub> OH (= 2 L/kg <sub>cat</sub> )<br>(considering density = 0.88 kg/L)                 | 2.6 · 10 <sup>-3</sup> | 1.76                                               |                              | 7.0 · 10 <sup>-5</sup>                                |
|                                                   | <b>Catalyst demand Kg (5.9 mol<sub>CO</sub>/s/Kg<sub>cat</sub>)</b>                                | 26                     |                                                    |                              |                                                       |
| <b>Catalyst lifetime Kgcat/h (2 years)</b>        | 1.5 · 10 <sup>-3</sup>                                                                             |                        |                                                    |                              |                                                       |
| <b>Catalyst MeOH</b>                              |                                                                                                    | <b>kg/h</b>            | <b>kg/kg<sub>cat</sub></b>                         | <b>kg/kg<sub>MeOH</sub></b>  | <b>m<sup>3</sup>/kg<sub>MeOH</sub></b>                |
|                                                   | Cu(NO <sub>3</sub> ) <sub>2</sub> ·3H <sub>2</sub> O                                               | 1.6 · 10 <sup>-1</sup> | 2.41                                               | 4.5 · 10 <sup>-6</sup>       |                                                       |
|                                                   | Al(NO <sub>3</sub> ) <sub>3</sub> ·9H <sub>2</sub> O                                               | 8.8 · 10 <sup>-2</sup> | 1.33                                               | 2.5 · 10 <sup>-6</sup>       |                                                       |
|                                                   | Zn(NO <sub>3</sub> ) <sub>2</sub> ·6H <sub>2</sub> O                                               | 6.8 · 10 <sup>-2</sup> | 1.03                                               | 1.9 · 10 <sup>-6</sup>       |                                                       |
|                                                   | <b>Catalyst demand Kg</b><br>(2.7 mol <sub>MeOH</sub> /s/Kg <sub>cat</sub> ) x 10 (catalyst guard) | 1154                   |                                                    |                              |                                                       |

|                               |                                                                     |                     |                                              |                             |                     |
|-------------------------------|---------------------------------------------------------------------|---------------------|----------------------------------------------|-----------------------------|---------------------|
|                               | <b>Catalyst lifetime Kg<sub>cat</sub>/h (2 years)</b>               | $6.6 \cdot 10^{-2}$ |                                              |                             |                     |
|                               |                                                                     | <b>kg/h</b>         | <b>kg/kg<sub>cat</sub></b>                   | <b>kg/kg<sub>MeOH</sub></b> |                     |
| <b>Catalyst SMR</b>           | Mg(NO <sub>3</sub> ) <sub>2</sub> ·6H <sub>2</sub> O                | $1.8 \cdot 10^{-3}$ | 1.68                                         | $5.0 \cdot 10^{-8}$         |                     |
|                               | Al(NO <sub>3</sub> ) <sub>3</sub> ·9H <sub>2</sub> O                | $5.1 \cdot 10^{-3}$ | 4.87                                         | $1.4 \cdot 10^{-7}$         |                     |
|                               | Ni(NO <sub>3</sub> ) <sub>2</sub> ·6H <sub>2</sub> O                | $5.2 \cdot 10^{-4}$ | 0.50                                         | $1.5 \cdot 10^{-8}$         |                     |
|                               | Fe(NO <sub>3</sub> ) <sub>3</sub> ·9H <sub>2</sub> O                | $4.2 \cdot 10^{-5}$ | 0.04                                         | $1.2 \cdot 10^{-9}$         |                     |
|                               | NH <sub>4</sub> OH (= 2 L/kg <sub>cat</sub> ; density = 0.88 kg/L)  | $1.8 \cdot 10^{-3}$ | 1.76                                         |                             | $5.0 \cdot 10^{-5}$ |
|                               | <b>Catalyst demand Kg (3.9 mol<sub>CO</sub>/s/Kg<sub>cat</sub>)</b> | 46                  |                                              |                             |                     |
|                               | <b>Catalyst lifetime Kg<sub>cat</sub>/h (5 years)</b>               | $1.0 \cdot 10^{-3}$ |                                              |                             |                     |
|                               |                                                                     | <b>kg/h</b>         | <b>kg/kg<sub>cat</sub></b>                   | <b>kg/kg<sub>MeOH</sub></b> |                     |
| <b>Catalyst WGS</b>           | La(NO <sub>3</sub> ) <sub>3</sub> ·6H <sub>2</sub> O                | $4.7 \cdot 10^{-2}$ | 2.20                                         | $1.3 \cdot 10^{-6}$         |                     |
|                               | (NH <sub>4</sub> ) <sub>2</sub> Ce(NO <sub>3</sub> ) <sub>6</sub>   | $1.7 \cdot 10^{-2}$ | 0.80                                         | $4.9 \cdot 10^{-7}$         |                     |
|                               | Fe(NO <sub>3</sub> ) <sub>3</sub> ·9H <sub>2</sub> O                | $1.6 \cdot 10^{-2}$ | 0.72                                         | $4.4 \cdot 10^{-7}$         |                     |
|                               | Glycerol                                                            | $4.1 \cdot 10^{-2}$ | 1.90                                         | $1.2 \cdot 10^{-6}$         |                     |
|                               | <b>Catalyst demand Kg (0.4 mol<sub>CO</sub>/s/Kg<sub>cat</sub>)</b> | 378                 |                                              |                             |                     |
|                               | <b>Catalyst lifetime Kg<sub>cat</sub>/h (2 years)</b>               | $2.2 \cdot 10^{-2}$ |                                              |                             |                     |
|                               |                                                                     | <b>kg/h</b>         | <b>Molecular weights (kg/koml)</b>           | <b>kg/kg<sub>MeOH</sub></b> |                     |
| <b>Wastes</b>                 | CO <sub>2</sub> (purge flaring+Waste 1/vapor distillate)            | 7103                | 44.1 CO <sub>2</sub>                         | 0.20                        |                     |
|                               | H <sub>2</sub> O (purge flaring+vapor distillate)                   | 7515                | 18.0 H <sub>2</sub> O                        | 0.21                        |                     |
|                               | CO <sub>2</sub> biogenic                                            | -                   | *8473 kg/h O <sub>2</sub> demand for flaring | -                           |                     |
|                               | Carbon                                                              | 39                  |                                              | $1.1 \cdot 10^{-3}$         |                     |
|                               | Water (Waste 2/Bottom liquid)                                       | 2363                |                                              | $7.0 \cdot 10^{-2}$         |                     |
|                               | Catalysts                                                           | $9.0 \cdot 10^{-2}$ |                                              | $2.5 \cdot 10^{-6}$         |                     |
|                               |                                                                     | <b>kg/h</b>         | <b>kg/k<sub>gcat</sub></b>                   | <b>kg/kg<sub>MeOH</sub></b> |                     |
| <b>H<sub>2</sub>S removal</b> | ZnO                                                                 |                     |                                              |                             |                     |
|                               | Material demand Kg/h (13.9 kgbiogas/ZnO)                            | 1350                |                                              | 0.13                        |                     |
|                               |                                                                     | <b>kg/h</b>         |                                              |                             |                     |
| <b>Product</b>                | MeOH                                                                | 35557               |                                              |                             |                     |

**Table S-7.** Ecoinvent dataset used for each mass and energy flow in the LCI modelling.

---

| <i>Inputs from Technosphere</i>  |                                                                                                      |
|----------------------------------|------------------------------------------------------------------------------------------------------|
| Natural gas                      | Natural gas, high pressure {Europe without Switzerland}  market group for   Cut-off, U               |
| Biogas                           | Biogas {CH}  anaerobic digestion of manure   Cut-off, U                                              |
| Water                            | Water, deionised {Europe without Switzerland}  market for water, deionised   Cut-off, U              |
| Hot utility                      | Heat, central or small-scale, natural gas {RER}  market group for   Cut-off, U                       |
| Electricity, low voltage         | Electricity, low voltage {RER}  market group for   Cut-off, U                                        |
| Electricity, high voltage        | Electricity, high voltage {RER}  market group for   Cut-off, U                                       |
| Cold utility, makeup water       | Water, decarbonised {RER}  water production, decarbonised adapted                                    |
| Catalyst DMR/BiMR/SMR            | Catalyst Fe-Ni/MgAl <sub>2</sub> O <sub>4</sub>                                                      |
| Catalyst MeOH                    | Catalyst Cu-Zn-Al                                                                                    |
| Catalyst WGS                     | Catalyst La-Ce-Fe                                                                                    |
| ZnO for H <sub>2</sub> S removal | Zinc oxide {GLO}  market for   Cut-off, U                                                            |
| <i>Emissions to air</i>          |                                                                                                      |
| CO <sub>2</sub> from flaring     | Carbon dioxide                                                                                       |
| H <sub>2</sub> O from flaring    | Water                                                                                                |
| <i>Outputs to Technosphere</i>   |                                                                                                      |
| Waste water                      | Wastewater, unpolluted {RoW}  treatment of, capacity 5E9l/year   Cut-off, U                          |
| Carbon waste                     | Inert waste, for final disposal {CH}  treatment of inert waste, inert material landfill   Cut-off, U |
| Catalyst waste                   | Spent catalyst base from ethylene oxide production {GLO}  market for   Cut-off, U                    |

---

**Table S-8.** Key performance indicators (KPI) as function of CH<sub>4</sub> conversion (x) in the DMR reactor. The KPI's were normalized to functional unit: Electricity, HV and LV (y<sub>1</sub> and y<sub>2</sub>) = kWh/kg<sub>MeOH</sub>; Heat, fossil-based (y<sub>3</sub>) = MJ/kg<sub>MeOH</sub>; Heat, electrically conductive (y<sub>7</sub>) = kWh/kg<sub>MeOH</sub>; Natural gas (y<sub>4</sub>) = m<sup>3</sup>/kg<sub>MeOH</sub>; Biogas (y<sub>5</sub>) = m<sup>3</sup>/kg<sub>MeOH</sub>; Direct CO<sub>2</sub> (y<sub>6</sub>) = kg<sub>CO2</sub>/kg<sub>MeOH</sub>. X ranges from 0.38-0.63 and 0.76-0.92 for the plasma-assisted and thermocatalytic DMR-to-MeOH process, respectively.

| KPI                           | Proposed DMR-to-MeOH processes     |                                                   |                                                   |  |
|-------------------------------|------------------------------------|---------------------------------------------------|---------------------------------------------------|--|
|                               | Scenario PNGG, PNGHVPV and PNGHVWM |                                                   | Scenario PBGG                                     |  |
| HV electricity <sup>1</sup>   | (y <sub>1</sub> )                  | $y_1 = 0.0469x^2 - 0.1554x + 6.3384; R^2=1$       | $y_1 = 0.0469x^2 - 0.1554x + 6.3384; R^2=1$       |  |
| LV electricity <sup>2</sup>   | (y <sub>2</sub> )                  | $y_2 = 0.0172x^2 - 0.1296x + 1.3498; R^2=1$       | $y_2 = 0.0172x^2 - 0.1296x + 1.3498; R^2=1$       |  |
| Heat                          | (y <sub>3</sub> )                  | $y_3 = 0.5481x^2 - 6.616x + 9.981; R^2=1$         | $y_3 = 0.5481x^2 - 6.616x + 9.981; R^2=1$         |  |
| Natural gas                   | (y <sub>4</sub> )                  | $y_4 = -0.0659x + 0.7906; R^2=0.9992$             |                                                   |  |
| Biogas                        | (y <sub>5</sub> )                  |                                                   | $y_5 = -0.139x + 1.6687; R^2=0.9992$              |  |
| Direct CO <sub>2</sub>        | (y <sub>6</sub> )                  | $y_6 = 0.0027x^2 + 0.0264x + 0.1156; R^2=1$       | $y_6 = 0.0027x^2 + 0.0264x + 0.1156; R^2=1$       |  |
|                               |                                    | Scenario TNG                                      | Scenario TBG                                      |  |
| LV electricity                | (y <sub>2</sub> )                  | $y_2 = -0.0084x^2 + 0.0092x + 1.4295; R^2=0.9874$ | $y_2 = -0.0084x^2 + 0.0092x + 1.4295; R^2=0.9874$ |  |
| Heat                          | (y <sub>3</sub> )                  | $y_3 = -1.8869x^2 + 2.4965x + 9.3912; R^2=0.9991$ | $y_3 = -1.8869x^2 + 2.4965x + 9.3912; R^2=0.9991$ |  |
| Natural gas                   | (y <sub>4</sub> )                  | $y_4 = -0.0123x + 0.6847; R^2=0.9995$             | $y_4 = -0.0083x + 0.4638; R^2=0.9995$             |  |
| Biogas                        | (y <sub>5</sub> )                  |                                                   | $y_5 = -0.0083x + 0.4638; R^2=0.9995$             |  |
| Direct CO <sub>2</sub>        | (y <sub>6</sub> )                  | $y_6 = -0.002\ln(x) + 0.1991; R^2=0.9340$         | $y_6 = -0.002\ln(x) + 0.1991; R^2=0.9340$         |  |
|                               |                                    | Scenario TNGG                                     | Scenario TNGPV and TNGWM                          |  |
| LV electricity                | (y <sub>2</sub> )                  | $y_2 = -0.5325x^2 + 0.7027x + 4.0382; R^2=0.9993$ | $y_2 = -0.0084x^2 + 0.0092x + 1.4295; R^2=0.9874$ |  |
| LV-H electricity <sup>3</sup> | (y <sub>7</sub> )                  |                                                   | $y_7 = -1.8869x^2 + 2.4965x + 9.3912; R^2=0.9991$ |  |
| Natural gas                   | (y <sub>4</sub> )                  | $y_4 = -0.0123x + 0.6847; R^2=0.9995$             | $y_4 = -0.0123x + 0.6847; R^2=0.9995$             |  |
| Direct CO <sub>2</sub>        | (y <sub>6</sub> )                  | $y_6 = -0.002\ln(x) + 0.1991; R^2=0.9340$         | $y_6 = -0.002\ln(x) + 0.1991; R^2=0.9340$         |  |
|                               |                                    | Scenario PNGWM                                    | Scenario TNGWM                                    |  |
| HV electricity                | (y <sub>1</sub> )                  | $y_1 = 0.0469x^2 - 0.1554x + 6.3384; R^2=1$       |                                                   |  |
| LV electricity                | (y <sub>2</sub> )                  | $y_2 = 0.1694x^2 - 1.9674x + 4.1223; R^2=1$       | $y_2 = -0.5325x^2 + 0.7027x + 4.0382; R^2=0.9993$ |  |
| Natural gas                   | (y <sub>4</sub> )                  | $y_4 = -0.0659x + 0.7906; R^2=0.9992$             | $y_4 = -0.0123x + 0.6847; R^2=0.9995$             |  |
| Direct CO <sub>2</sub>        | (y <sub>6</sub> )                  | $y_6 = 0.0027x^2 + 0.0264x + 0.1156; R^2=1$       | $y_6 = -0.002\ln(x) + 0.1991; R^2=0.9340$         |  |

<sup>1</sup> High voltage electricity only utilized in plasma reactor

<sup>2</sup> Low voltage electricity utilized for electrically conductive heating and fluids transfer

<sup>3</sup> Low voltage electricity utilized for electrically conductive heating in thermocatalytic reactor

**Table S-9.** Environmental footprint results for all the scenarios

| <b>Indicator</b>                  | <b>Unit</b>            | <b>PNGG</b>    | <b>PBGG</b>    | <b>TNG</b>   | <b>TBG</b>   |
|-----------------------------------|------------------------|----------------|----------------|--------------|--------------|
| Climate change                    | kg CO <sub>2</sub> eq  | 4.12E+00       | 7.46E+00       | 1.86E+00     | 2.82E+00     |
| Ozone depletion                   | kg CFC11 eq            | 5.96E-07       | 4.28E-07       | 3.76E-07     | 3.28E-07     |
| Ionising radiation                | kBq U-235 eq           | 1.77E+00       | 1.86E+00       | 3.58E-01     | 3.85E-01     |
| Photochemical ozone formation     | kg NMVOC eq            | 8.69E-03       | 9.80E-03       | 3.14E-03     | 3.47E-03     |
| Particulate matter                | disease inc.           | 5.43E-08       | 5.80E-07       | 1.67E-08     | 1.68E-07     |
| Human toxicity, non-cancer        | CTUh                   | 3.23E-08       | 4.53E-08       | 1.08E-08     | 1.46E-08     |
| Human toxicity, cancer            | CTUh                   | 9.82E-10       | 1.21E-09       | 4.30E-10     | 4.98E-10     |
| Acidification                     | mol H <sup>+</sup> eq  | 1.93E-02       | 9.10E-02       | 5.43E-03     | 2.60E-02     |
| Eutrophication, freshwater        | kg P eq                | 3.14E-03       | 3.22E-03       | 6.49E-04     | 6.74E-04     |
| Eutrophication, marine            | kg N eq                | 3.33E-03       | 5.68E-03       | 9.62E-04     | 1.64E-03     |
| Eutrophication, terrestrial       | mol N eq               | 3.19E-02       | 3.49E-01       | 9.55E-03     | 1.01E-01     |
| Ecotoxicity, freshwater           | CTUe                   | 4.14E+01       | 5.30E+01       | 1.48E+01     | 1.82E+01     |
| Land use                          | Pt                     | 1.51E+01       | 2.49E+01       | 3.83E+00     | 6.65E+00     |
| Water use                         | m <sup>3</sup> depriv. | 1.07E+00       | 1.10E+00       | 5.83E-01     | 5.92E-01     |
| Resource use, fossils             | MJ                     | 1.04E+02       | 8.17E+01       | 5.15E+01     | 4.51E+01     |
| Resource use, minerals and metals | kg Sb eq               | 1.13E-05       | 1.68E-05       | 6.38E-06     | 8.01E-06     |
| <b>Indicator</b>                  | <b>Unit</b>            | <b>PNGHVPV</b> | <b>PNGHVWM</b> | <b>TNGG</b>  | <b>TNGPV</b> |
| Climate change                    | kg CO <sub>2</sub> eq  | 1.82E+00       | 1.71E+00       | 2.29E+00     | 1.79E+00     |
| Ozone depletion                   | kg CFC11 eq            | 4.05E-07       | 3.91E-07       | 4.00E-07     | 3.60E-07     |
| Ionising radiation                | kBq U-235 eq           | 3.30E-01       | 3.35E-01       | 1.01E+00     | 6.81E-01     |
| Photochemical ozone formation     | kg NMVOC eq            | 4.04E-03       | 4.04E-03       | 5.14E-03     | 4.19E-03     |
| Particulate matter                | disease inc.           | 2.80E-08       | 3.57E-08       | 3.34E-08     | 3.06E-08     |
| Human toxicity, non-cancer        | CTUh                   | 1.49E-08       | 3.77E-08       | 2.36E-08     | 2.11E-08     |
| Human toxicity, cancer            | CTUh                   | 8.03E-10       | 1.28E-09       | 7.21E-10     | 6.55E-10     |
| Acidification                     | mol H <sup>+</sup> eq  | 6.45E-03       | 7.64E-03       | 1.15E-02     | 8.75E-03     |
| Eutrophication, freshwater        | kg P eq                | 6.39E-04       | 8.71E-04       | 1.82E-03     | 1.28E-03     |
| Eutrophication, marine            | kg N eq                | 1.25E-03       | 1.20E-03       | 1.95E-03     | 1.50E-03     |
| Eutrophication, terrestrial       | mol N eq               | 1.26E-02       | 1.23E-02       | 1.88E-02     | 1.46E-02     |
| Ecotoxicity, freshwater           | CTUe                   | 2.08E+01       | 3.52E+01       | 2.77E+01     | 2.35E+01     |
| Land use                          | Pt                     | 1.72E+01       | 5.69E+00       | 9.45E+00     | 2.35E+01     |
| Water use                         | m <sup>3</sup> depriv. | 5.43E-01       | 5.70E-01       | 8.51E-01     | 8.14E-01     |
| Resource use, fossils             | MJ                     | 5.42E+01       | 5.24E+01       | 6.53E+01     | 5.41E+01     |
| Resource use, minerals and metals | kg Sb eq               | 9.58E-06       | 2.75E-05       | 1.36E-05     | 2.77E-05     |
| <b>Indicator</b>                  | <b>Unit</b>            | <b>TNGWM</b>   | <b>PNGWM</b>   | <b>TNGWM</b> |              |
| Climate change                    | kg CO <sub>2</sub> eq  | 1.73E+00       | 1.21E+00       | 6.15E-01     |              |
| Ozone depletion                   | kg CFC11 eq            | 3.52E-07       | 3.47E-07       | 2.57E-07     |              |
| Ionising radiation                | kBq U-235 eq           | 6.74E-01       | 3.58E-02       | 1.87E-02     |              |
| Photochemical ozone formation     | kg NMVOC eq            | 3.98E-03       | 3.00E-03       | 1.70E-03     |              |
| Particulate matter                | disease inc.           | 2.77E-08       | 3.06E-08       | 1.64E-08     |              |
| Human toxicity, non-cancer        | CTUh                   | 2.30E-08       | 3.71E-08       | 2.17E-08     |              |
| Human toxicity, cancer            | CTUh                   | 7.32E-10       | 1.28E-09       | 7.53E-10     |              |
| Acidification                     | mol H <sup>+</sup> eq  | 8.65E-03       | 5.04E-03       | 2.96E-03     |              |
| Eutrophication, freshwater        | kg P eq                | 1.28E-03       | 3.87E-04       | 2.23E-04     |              |
| Eutrophication, marine            | kg N eq                | 1.43E-03       | 7.37E-04       | 4.18E-04     |              |
| Eutrophication, terrestrial       | mol N eq               | 1.40E-02       | 8.01E-03       | 4.58E-03     |              |

|                                   |                        |          |          |          |
|-----------------------------------|------------------------|----------|----------|----------|
| Ecotoxicity, freshwater           | CTUe                   | 2.47E+01 | 3.25E+01 | 1.89E+01 |
| Land use                          | Pt                     | 6.86E+00 | 3.35E+00 | 1.74E+00 |
| Water use                         | m <sup>3</sup> depriv. | 7.27E-01 | 4.58E-01 | 4.82E-01 |
| Resource use, fossils             | MJ                     | 5.32E+01 | 4.15E+01 | 2.94E+01 |
| Resource use, minerals and metals | kg Sb eq               | 1.53E-05 | 2.91E-05 | 1.87E-05 |

---
